# Supplementary material for: Mapping the evidence on identity processes and identity-related interventions in the smoking and physical activity domains: a scoping review protocol
Source: HighWire-hosted journal article supplement (doi:10.1136/bmjopen-2021-058405), 2022-07-01
Supplement: bmjopen-2021-058405supp001_data_supplement.pdf [file bmjopen-2021-058405supp001_data_supplement.pdf]

## Supplementary Material 1: Search Strategy Developed for PubMed

("Identification, Psychological"[majr] OR "Social Identification"[majr] OR "identity"[ti] OR "Self Concept"[majr:noexp] OR "Self Concept"[ti] OR "self perception\*"[ti] OR "self image\*"[ti] OR "self view\*"[ti] OR "sense of self"[ti] OR "sense of identity"[ti] OR "sense of identities"[ti] OR "Social Identification"[majr] OR "Social Identification"[ti] OR "self identity"[ti] OR "self identities"[ti] OR "social identity"[ti] OR "social identities"[ti] OR "identity formation\*"[ti] OR "identity maintenance"[ti] OR "identity change\*"[ti] OR "identity process\*"[ti] OR "identity related intervention\*"[ti] OR "self conception"[ti] OR "self conceptions"[ti] OR ("identit\*"[ti] AND ("construct\*"[ti] OR "chang\*"[ti] OR "creat\*"[ti])) OR "self schema"[ti] OR "self schemata"[ti] OR "self schema\*"[ti] OR "selfschema"[ti] OR "selfschemata"[ti] OR "selfschema\*"[ti] OR "self definition"[ti] OR "self defin\*"[ti] OR "selfdefinition"[ti] OR "selfdefin\*"[ti] OR "possible self"[ti] OR "possible selves"[ti] OR "possible self\*"[ti] OR "possible selv\*"[ti] OR "future self"[ti] OR "future selves"[ti] OR "future self\*"[ti] OR "future selve\*"[ti] OR "prototype self"[ti] OR "prototype selves"[ti] OR "prototype self\*"[ti] OR "prototype selv\*"[ti])

**AND** ("Smoking"[majr] OR "Smoking"[ti] OR "Smoking Cessation"[majr] OR "Smoking Devices"[majr] OR "cigar"[ti] OR "cigars"[ti] OR "cigarette"[ti] OR "cigarettes"[ti] OR "tobacco"[ti] OR "smoker"[ti] OR "smoker\*"[ti] OR "smokers"[ti] OR "smoking behavior\*"[ti] OR "smoking behaviour\*"[ti] OR "tobacco use cessation\*"[ti] OR "nicotine use cessation"[ti] OR "quitting smoking\*"[ti] OR "quit smoking\*"[ti] OR "stop smoking\*"[ti] OR "smoking reduction"[ti] OR "smoking abstinence"[ti] OR "cessation"[ti])

**OR** "Exercise"[majr] OR "Exercise"[ti] OR "Exercis\*"[ti] OR "Physical Activity"[ti] OR "Physical Activit\*"[ti] OR "Physically Activ\*"[ti] OR "Physical Inactivit\*"[ti] OR "Physically Inactiv\*"[ti] OR "physical exercise\*"[ti] OR "Sports"[majr] OR "sports"[ti] OR

"sport"[ti] OR "Physical Fitness"[majr] OR "Athletic Performance"[majr] OR "fitness"[ti]  
OR "physical training"[ti] OR "athletic activity"[ti] OR "Athletic Performance"[ti])

**NOT** ("Animals"[mesh]

**NOT** "Humans"[mesh])

Search strategies developed for the PsycINFO, Embase, Emcare, Web of Science Core Collection, Wiley Cochrane Library, Psychology, Behavioural Sciences Collection and Academic Search Premier, OpenGrey.eu and British Library EthOS databases are available upon request.
